# Supplementary material
Source: PubMed Central journal article supplement (PMC1187944)
Supplement: 7600761s1.pdf [file 7600761s1.pdf]

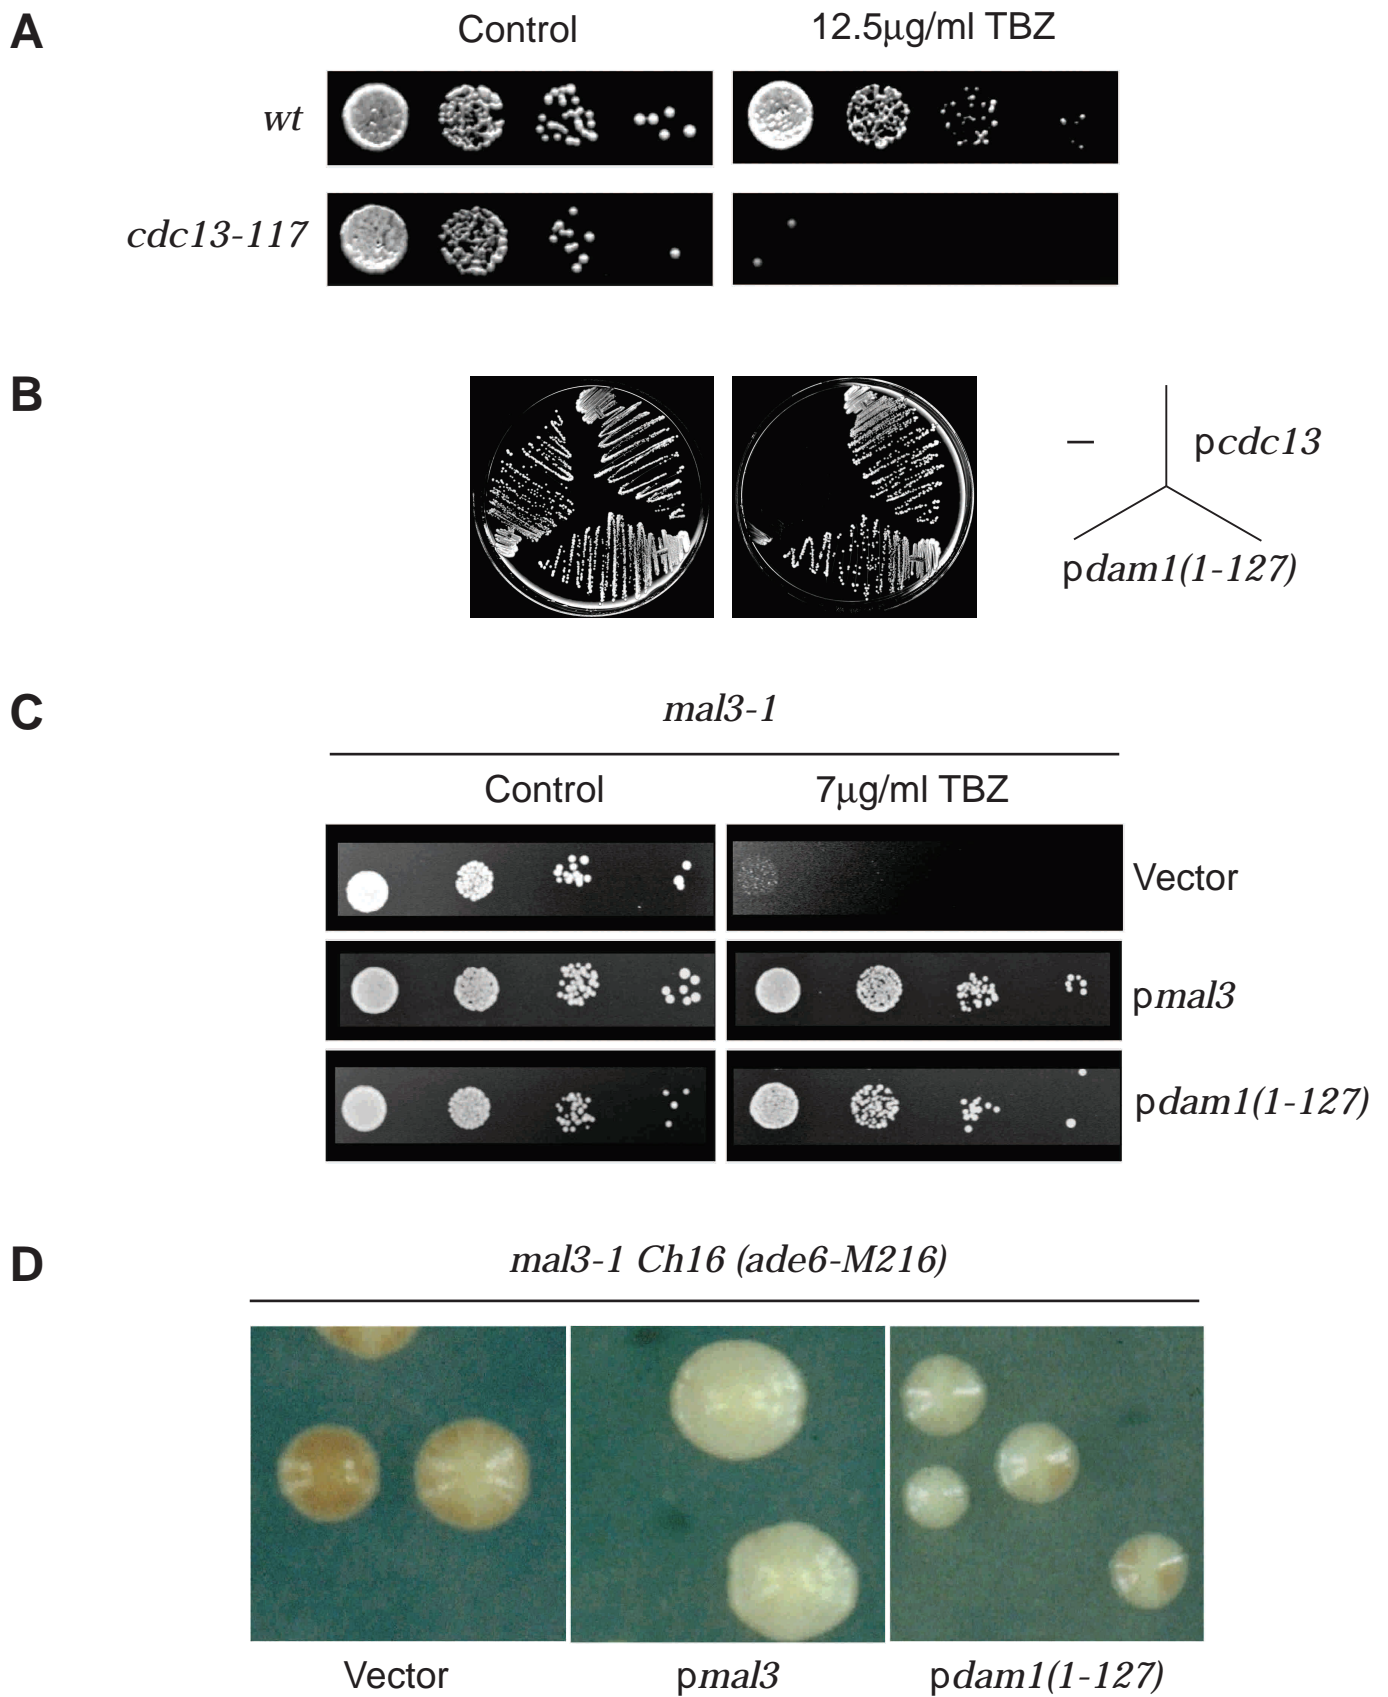

Supplementary Figure 1. Sanchez-Perez et al.

**Supplementary Figure 1. *dam1(1-127)* suppresses the sensitivity of *cdc13-117* and *mal3-1* cells to thiabendazole.**

(A) Wild type or *cdc13-117* cells were plated on rich medium either in the absence or presence of 12.5 µg/ml TBZ and incubated for 2 days at 30°C. (B) *cdc13-117* cells transformed with either empty vector pUR19, pUR19-*dam1(1-127)* or pUR19-*cdc13* were streaked on selective medium either in the absence (control) or presence of 12.5 µg/ml TBZ and incubated for 3 days at 30°C. (C) Serial dilutions of *mal3-1* cells transformed with either empty pUR19 plasmid (Vector), pUR19-*mal3* (*pmal3*), or pUR19-*dam1(1-127)* (*pdam1(1-127)*) were plated either on EMM medium lacking uracil either in the absence (control) or presence of 7 µg/ml TBZ. (D) *mal3-1* Ch16 (*ade6-M216*) transformed with the same plasmids as in (A) were plated onto EMM minimal medium lacking uracil and limiting adenine. Colonies were photographed after 3 days at 30°C and the percentage of chromosome loss per cell division calculated.

**A**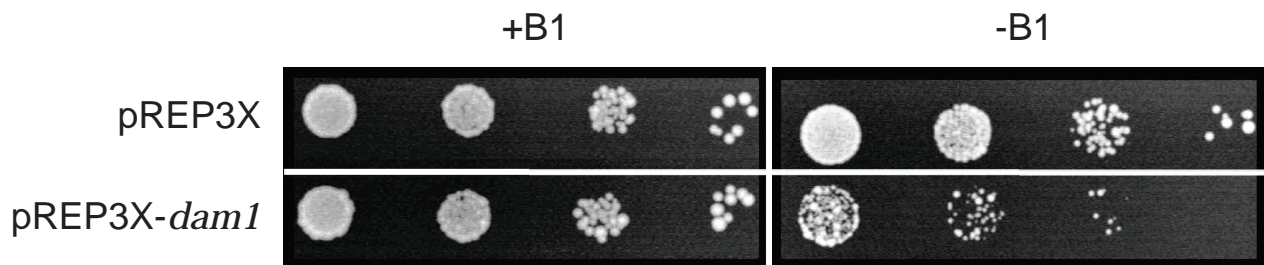**B**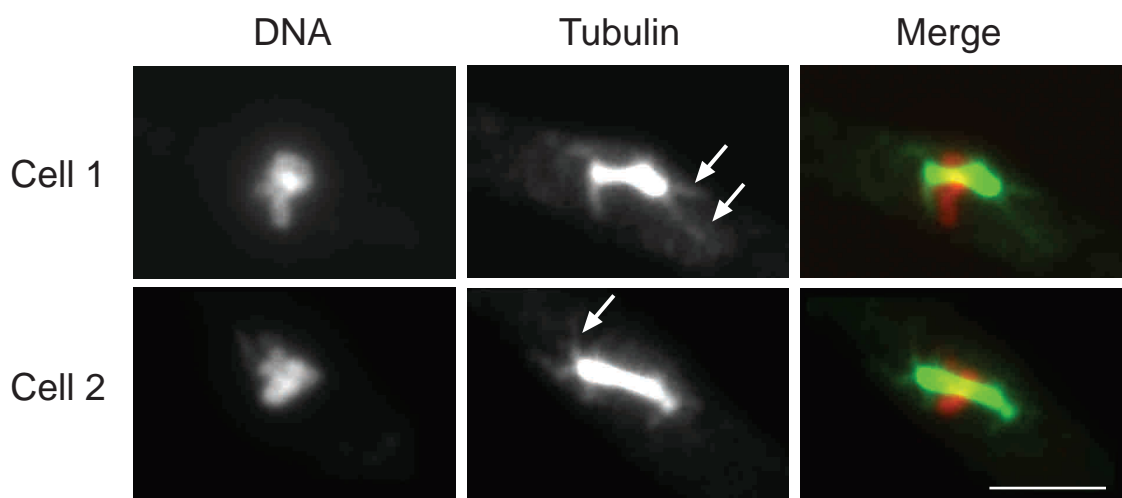

**Supplementary Figure 2. Overexpression of *dam1* arrests cells in mitosis.**

(A) Full length *dam1* was expressed from the wild type regulatable *nmt1* promoter. Ten fold serial dilutions ( $10^4$  -  $10^1$ ) of wild type cells transformed with either empty vector (pREP1) or pREP1-*dam1* were plated on minimal medium lacking leucine either in the presence (+B1) or absence (-B1) of thiamine for 5 days at 30°C. (B) Photomicrographs of two wild type cells overexpressing *dam1*. Fixed cells were stained with DAPI (DNA) and the anti-tubulin antibody TAT1 (tubulin). Scale bar = 2  $\mu$ m.

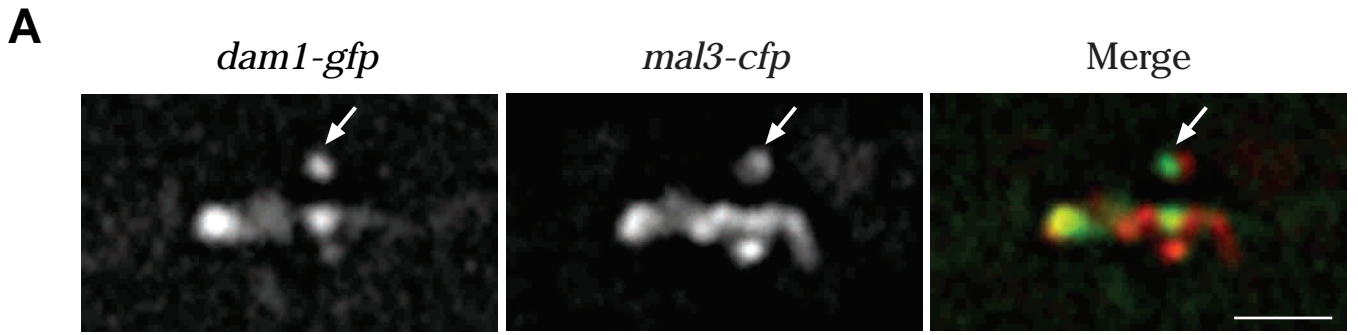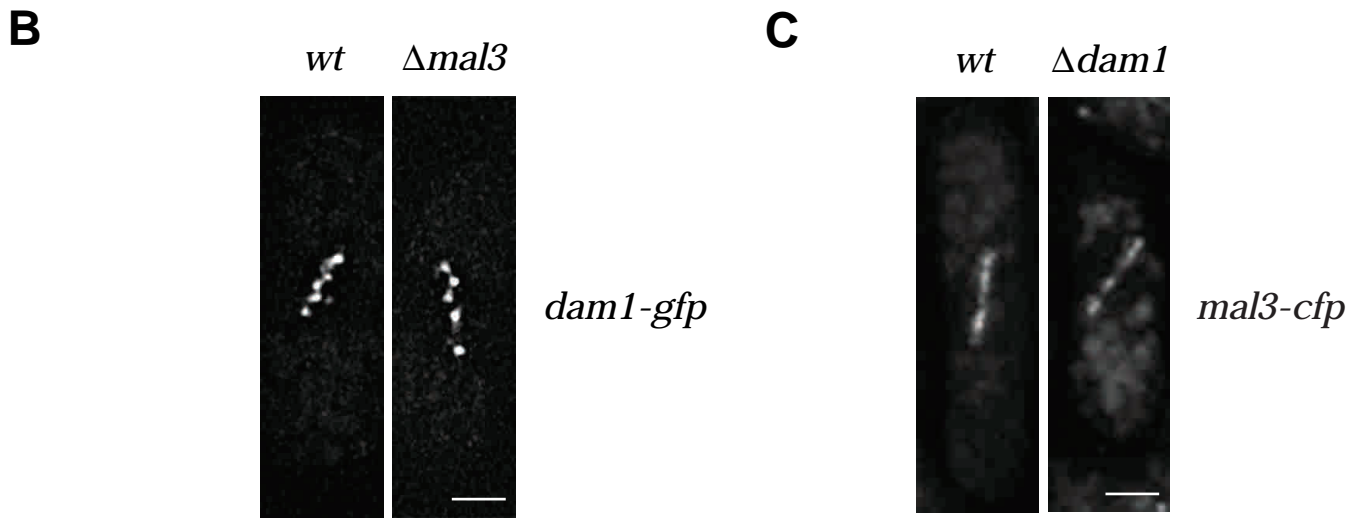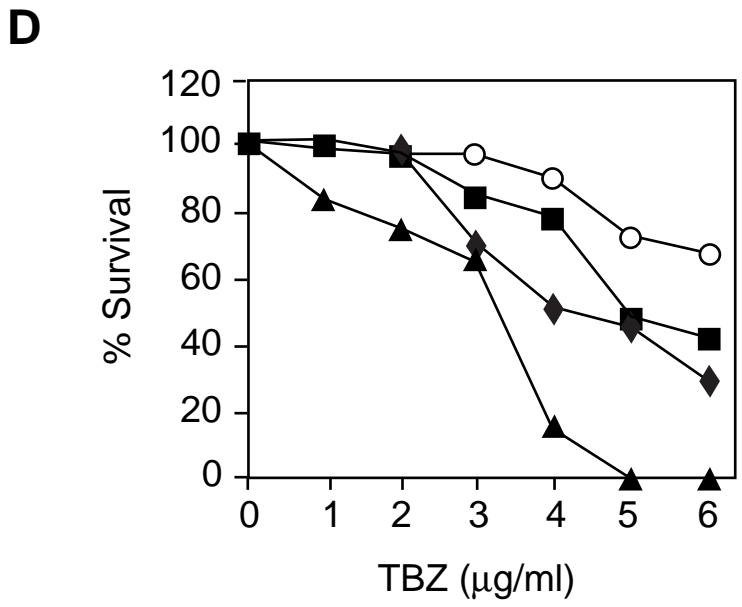

Supplementary Figure 3. Sanchez-Perez et al.

**Supplementary Figure 3. Dam1 and Mal3 act independently in mitosis.**

(A) Image of a *dam1-gfp mal3-cfp* cell in mitosis. Arrow shows that Mal3 and Dam1 frequently co-localise in mitosis. Scale bar = 1  $\mu$ m (B) Mitotic *dam1-gfp* or  $\Delta$ *mal3* *dam1-gfp* cells were visualised by fluorescence microscopy. Scale bar = 1  $\mu$ m. (C) Mitotic *mal3-cfp* or  $\Delta$ *dam1 mal3-cfp* cells were visualised by fluorescence microscopy. Scale bar = 1  $\mu$ m. (D) 500 cells from log phase cultures of wild type (open circles),  $\Delta$ *dam1* (closed squares),  $\Delta$ *mal3* (Closed diamonds) or  $\Delta$ *dam1*  $\Delta$ *mal3* (closed triangles) cells were plated onto fresh medium containing various concentrations of TBZ in triplicate. Cell viability was expressed as the percentage of colonies formed relative to the control plate.

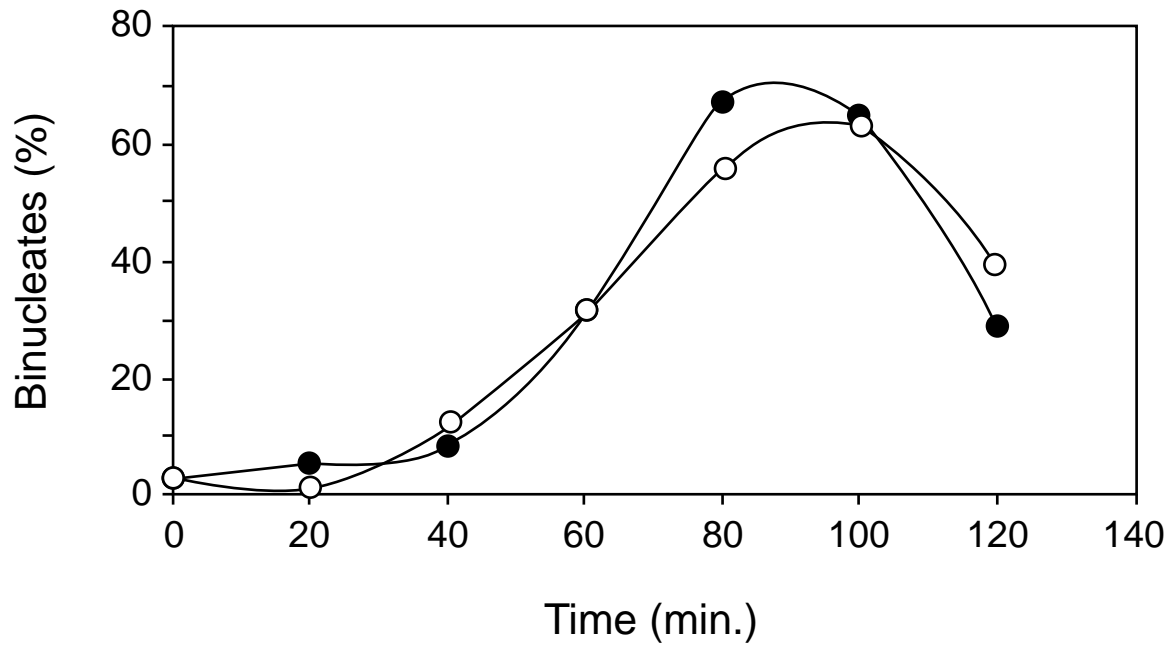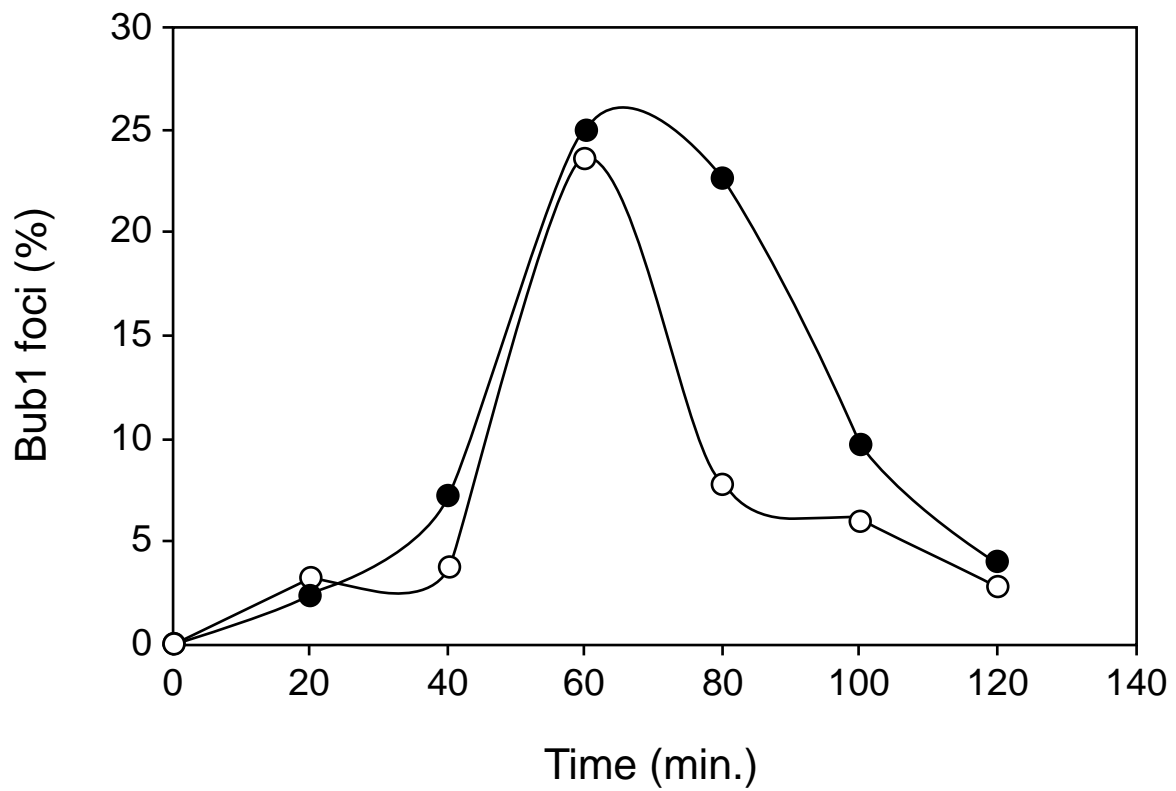

Supplementary Figure 4. Sanchez-Perez et al.

**Supplementary Figure 4. Bub1 associates to kinetochores for longer in the absence of Dam1.** Log phase *bub1-gfp cdc11-cfp* and  $\Delta$ *dam1 bub1-gfp cdc11-cfp* cells were synchronised in G2 and released into rich medium. The percentage of binucleate cells (top panel) or cells with non-SPB associated Bub1 dots (bottom panel) was measured at each time point (n=300).



**Supplementary Table I. *S.pombe* orthologues of the *S.cerevisiae* DASH complex**

| <i>S.c.</i> protein    | <i>S.p.</i> gene /<br>chromosomal locus | BLAST<br>Score | Proposed<br><i>S.p.</i> name | Protein<br>Length (a.a.) |
|------------------------|-----------------------------------------|----------------|------------------------------|--------------------------|
| <i>S.c.</i> Dam1       | SPAC589.08c                             | 0.0008         | <i>S.p.</i> Dam1             | 155                      |
| <i>S.c.</i> Duo1       | SPBC32F12.08c                           | 0.89*          | <i>S.p.</i> Duo1             | 172                      |
| <i>S.c.</i> Ask1       | SPBC27.02c                              | 2.4 x e-09     | <i>S.p.</i> Ask1             | 307                      |
| <i>S.c.</i> Spc34      | SPAC8C9.17c                             | 0.0073         | <i>S.p.</i> Spc34            | 164                      |
| <i>S.c.</i> Spc19      | SPCC1223                                | 0.0098         | <i>S.p.</i> Spc19            | **                       |
| <i>S.c.</i> Dad1       | SPAC16A10.05c                           | 0.00049        | <i>S.p.</i> Dad1             | 85                       |
| <i>S.c.</i> Dad2(Hsk1) | <i>hos2</i>                             | 5.4 x e-05     | <i>S.p.</i> Dad2             | 94                       |
| <i>S.c.</i> Dad3       | SPAC14C4.16                             | 2.3 x e-06     | <i>S.p.</i> Dad3             | 86                       |
| <i>S.c.</i> Dad4(Hsk2) | SPBC3B9                                 | 0.00039        | <i>S.p.</i> Dad4             | **                       |
| <i>S.c.</i> Hsk3       | <i>hos3</i>                             | 0.012          | <i>S.p.</i> Hsk3             | 133                      |

\* *S.p.*Duo1 shows limited sequence homology to *S.c.*Duo1 but is required for binding of *S.p.*Dam1 to kinetochores (see text)

\*\* *S.p.*Spc19 and *S.p.*Dad4 have not been annotated as ORFs in the *S.pombe* GeneDB database.

**Supplementary Table II. Strains used in this study**

| Strain no. | Genotype                                                     | Reference    |
|------------|--------------------------------------------------------------|--------------|
| PR109      | <i>h-</i>                                                    | our stocks   |
| JM2767     | <i>h- cdc13-117</i>                                          | our stocks   |
| UFYS0203   | <i>h- mal3-1 ura4-D6 Ch16[ade6-M216]</i>                     | our stocks   |
| JM2881     | <i>h- dam1::kanR</i>                                         | this study   |
| JM2952     | <i>h- dam1::hygR</i>                                         | this study   |
| JM2949     | <i>h- duo1::hygR</i>                                         | this study   |
| JM3016     | <i>h- spc34::kanR</i>                                        | this study   |
| JM2948     | <i>h- ask1::hygR</i>                                         | this study   |
| JM3074     | <i>h- dad1::hygR</i>                                         | this study   |
| JY741DH2   | <i>h- hos2::ura4 ade6-M216</i>                               | H. Aiba      |
| JY741DH3   | <i>h- hos3::ura4 ade6-M216</i>                               | H. Aiba      |
| JM2959     | <i>h+ dam1-GFP:kanR</i>                                      | this study   |
| KC63       | <i>h- dad1-GFP:kanR his2-245</i>                             | this study   |
| KC56       | <i>h- dad1-GFP:kanR nuf2-cfp:kanR</i>                        | this study   |
| JM3146     | <i>h- dad1-GFP:kanR ndc80-cfp:kanR</i>                       | this study   |
| JM2940     | <i>h- dam1-GFP:kanR ndc80-CFP:kanR</i>                       | this study   |
| JM3075     | <i>h- dam1-GFP:kanR duo1::hygR cdc11-CFP:kanR</i>            | this study   |
| JM3077     | <i>h- dam1-GFP:kanR ask1::hygR cdc11-CFP:kanR</i>            | this study   |
| JM3049     | <i>h+ dam1-GFP:kanR spc34::hygR cdc11-CFP:kanR</i>           | this study   |
| JM3079     | <i>h- dam1-GFP:kanR dad1::hygR cdc11-CFP:kanR</i>            | this study   |
| JM2939     | <i>h+ dam1::kanR ade6-M210 [Ch16 (ade6-M216 bub1::ura4)]</i> | this study   |
| JM2886     | <i>h? dam1::kanR lys1:lacO his7:GFP-NLS-lacI</i>             | this study   |
| JM2590     | <i>h+ cdc13-GFP(LEU2):cdc13-117</i>                          | M. Yanagida  |
| JM3029     | <i>h- cdc13-GFP(LEU2):cdc13-117 dam1::hygR</i>               | this study   |
| JM2763     | <i>h- ndc80-GFP:kanR cdc11-CFP:kanR</i>                      | our stocks   |
| JM2888     | <i>h? dam1::hygR ndc80-GFP:kanR cdc11-CFP:kanR</i>           | this study   |
| AE304      | <i>h+ mad2-GFP(LEU2) ura4<sup>+</sup></i>                    | T. Matsumoto |
| MA071      | <i>h- mad2-GFP:kanR his3-237</i>                             | our stocks   |
| JM2967     | <i>h- dam1::hygR mad2-GFP(LEU2)</i>                          | this study   |
| MA239      | <i>h+ bub1-GFP:kanR</i>                                      | our stocks   |
| JM3082     | <i>h- dam1::hygR bub1-GFP:kanR</i>                           | this study   |
| AE148      | <i>h- mad2::ura4</i>                                         | T. Matsumoto |

|           |                                                                 |             |
|-----------|-----------------------------------------------------------------|-------------|
| JM2883    | <i>h- mad2::ura4 dam1::kanR</i>                                 | this study  |
| JM2323    | <i>h- bub1::ura4</i>                                            | K. Hardwick |
| JM2884    | <i>h- bub1::ura4 dam1::kanR</i>                                 | this study  |
| JM2565    | <i>h- lys1:nmt1-gfp-atb2</i>                                    | our stocks  |
| JM2568    | <i>h- lys1:nmt1-gfp-atb2 mad2::ura4</i>                         | our stocks  |
| JM2887    | <i>h- lys1:nmt1-gfp-atb2 dam1::kanR</i>                         | this study  |
| JM3043    | <i>h+ lys1:nmt1-gfp-atb2 mad2::ura4 dam1::kanR</i>              | this study  |
| JM2962    | <i>h- mal3::ura4</i>                                            | our stocks  |
| JM2965    | <i>h- mal3::ura4 dam1-GFP:kanR</i>                              | this study  |
| JM2885    | <i>h+ mal3::ura4 dam1::kanR</i>                                 | this study  |
| DM443     | <i>h+ pkl1::ura4 ade6-M216 his3-D1</i>                          | R. McIntosh |
| DM227     | <i>h- klp2::ura4 ade6-M210 his3-D1</i>                          | R. McIntosh |
| ZC263     | <i>h- klp3::ura4 ade6- his3-237</i>                             | Z. Cande    |
| DM474     | <i>h- tea2::his3 ade6- his3-D1</i>                              | R. McIntosh |
| MA060     | <i>h+ klp5::ura4 ade6-M216</i>                                  | our stocks  |
| MA101     | <i>h- klp6::ura4 his7-366</i>                                   | our stocks  |
| JM3190    | <i>h+ klp5::ura4 lys1:nmt1-gfp-atb2</i>                         | this study  |
| JM3191    | <i>h- dam1::LEU2 lys1:nmt1-gfp-atb2</i>                         | this study  |
| JM3155    | <i>h+ klp5::ura4 mad2-GFP:kanR</i>                              | this study  |
| JM3167    | <i>h- dam1::LEU2 mad2-GFP:kanR</i>                              | this study  |
| JM3014    | <i>h- klp5::ura4 lys1:lacO his7:GFP-NLS-lacI cdc11-CFP:kanR</i> | this study  |
| JM3060    | <i>h+ dam1::LEU2 lys1:lacO his7:GFP-NLS-lacI cdc11-CFP:kanR</i> | this study  |
| SP540     | <i>h- mis6-302 ura4+ ade6-M216</i>                              | M. Yanagida |
| SP920     | <i>h- mis12-537</i>                                             | M. Yanagida |
| SP525     | <i>h- cnp1::ura4 lys1:cnp1-1</i>                                | M. Yanagida |
| ANF254-3A | <i>h+ nuf2-4 leu1<sup>+</sup> ura4<sup>+</sup></i>              | Y. Hiraoka  |
| VFY852    | <i>h- mal2-1 ade6-M210</i>                                      | U. Fleig    |
| KC181     | <i>h- mis6-302 dad1-gfp:kanR</i>                                | this study  |
| KC179     | <i>h- mis12-537 dad1-gfp:kanR</i>                               | this study  |
| KC200     | <i>h- cnp1::ura4 lys1:cnp1-1 dad1-gfp:kanR</i>                  | this study  |
| KC199     | <i>h+ nuf2-4 dad1-gfp:kanR</i>                                  | this study  |
| KC201     | <i>h+ mal2-1 dad1-gfp:kanR</i>                                  | this study  |
| KC186     | <i>h- mis12-537 dam1::kanR</i>                                  | this study  |
| KC188     | <i>h+ cnp1::ura4 lys1:cnp1-1 dam1::hygR</i>                     | this study  |
| KC158     | <i>h+ mis12-537 ask1::kanR his2-245</i>                         | this study  |
| KC190     | <i>h+ cnp1::ura4 lys1:cnp1-1 ask1::hygR his2-245</i>            | this study  |

|        |                                         |            |
|--------|-----------------------------------------|------------|
| JM3145 | <i>h+ dad1-GFP ndc80-CFP</i>            | this study |
| MA147  | <i>h- mal3-CFP:kanR</i>                 | our stocks |
| JM3152 | <i>h- dam1::hygR mal3-CFP:kanR</i>      | this study |
| JM3143 | <i>h- dam1-GFP:kanR mal3-CFP:kanR</i>   | this study |
| JM3185 | <i>h- dam1::hygR dad1-GFP</i>           | this study |
| JM3186 | <i>h- dam1::hygR dad1-GFP ndc80-CFP</i> | this study |
| JM3174 | <i>h- nmt1-GFP-dam1:kanR</i>            | this study |

---

All strains are *leu1-32 ura4-D18* unless otherwise stated. *ade6-* is either *ade6-M210* or *ade6-M216*.

**Supplementary Table III. Oligonucleotides used in this study**

***dam1::kanR and dam1:hygR***

F:TGTTAAAAATTGTATATAAATCGTAAAATTGAATGATCATTATGATTCCGTT  
GTTTCATTATCCAACCTGATATGCTAGGCGGATCCCCGGGTTAATTAA  
R:AACGTCGGAAGAAAAATGTTCCCTGCTGCTGCTGCCGAAAGCGCTGTAGAAC  
ATCTACATCTCACCCAAAGTCGCGAAAACGAATTCGAGCTCGTTTAAAC

***dam1::LEU2***

F:TGTTAAAAATTGTATATAAATCGTAAAATTGAATGATCATTATGATTCCGTT  
GTTTCATTATCCAACCTGATATGCTAGGCGAGGAGAACTTTCTAGTATAT  
R:AACGTCGGAAGAAAAATGTTCCCTGCTGCTGCTGCCGAAAGCGCTGTAGAAC  
ATCTACATCTCACCCAAAGTCGCGAAAACCGACTACGTCGTTAAGGCC

***dam1 (1-153):kanR***

W:GGATGATAATGTGAGTGAATT  
X:GGGGATCCGTCGACCTGCAGCGTACGACTAATCGTGAGAAATAACACCAC  
Y:GTTTAAACGAGCTCGAATTCATCGATTAAGCAAGGGAGACTGGTT  
Z:TGAAGATTGGAGAAGCTATTA

***dam1 (1-127):kanR***

W:GGATGATAATGTGAGTGAATT  
X:GGGGATCCGTCGACCTGCAGCGTACGAATCGTGAGAAATAACACCAC  
Y:GTTTAAACGAGCTCGAATTCATCGATTAAGCAAGGGAGACTGGTT  
Z:TGAAGATTGGAGAAGCTATTA

***dam1-GFP:kanR***

F:ATTTTGCAACTGCAGACGAAACATTTGCTACAAATGACACTTCTTTCAGAAC  
GGCCAGAAACCTATTCCGCTTCCAGACGGATCCCCGGGTTAATTAA  
R:GATTGGAGAAGCTATTACATATGAGTTTACTGAACGCTTCTAGAACTTTTA  
AAGCAATTGTCTACAGTTCCTTCGCTGGAATTCGAGCTCGTTTAAAC

***nmt1-GFP-dam1:kanR***

F:GCAGAAAAAGTCGCATAGTTTCCATTACCCACACGGTCATCTCACGAAGAG  
AATTCTGAGTCAATTTTGAGGGTTGATGGAATTCGAGCTCGTTTAAAC  
R:GGGATTGCATTCTCACTTTCTATTTTCACATTATCAACATTTTCTAAAGGATT  
TTGATAGCTTTCTGGTATTTCTCCATTTTGTATAGTTCATCCATGC

***dad1::hygR***

F:CTTGATTGTAACCTTATGATAAACTTTGGCTCATGCTTGACTTTGACACTAGC  
CATTAACATAACCATGTCCTCAGAAAATCGGATCCCCGGGTAAATTAA  
R:TGTAATATGTAAGTTAATTTAAAAGAATCCTGACCTTTGACCAATTTTGGAG  
GACGCTATTAATTTATAGATTCATAAAGAATTCGAGCTCGTTTAAAC

***dad1-gfp:kanR***

W: CTATGCTCGTACGGAAGC  
X: GGGGATCCGTCGACCTGCAGCGTACGAAGGTGCATCTAGCATTTC  
Y:GTTTAAACGAGCTCGAATTCATCGATCTCCTGACCAGCAGTATCC  
Z:AGGTGAATGACAGCTGGTC

***spc34:: kanR and spc34::hygR***

W:GTATTGGGAGTAAGCCGATC  
X:GGGGATCCGTCGACCTGCAGCGTACGAGGAAGGCTATTTGCGTTGG  
Y:GTTTAAACGAGCTCGAATTCATCGATCTGATGTAGCAGCAATAGAC  
Z:GCAAGGAATGAACGCAATGC

***duo1:: kanR and duo1:: hygR***

W:GGTTGAGTGGTTTCACGAGTG  
X:GGGGATCCGTCGACCTGCAGCGTACGAGACTTCTAACCCAAACTCAC  
Y:GTTTAAACGAGCTCGAATTCATCGATGTGTGCAATTTAAGCCTAAC  
Z:GTAATGCACATAACTAACTCTTT

***ask1:: kanR and ask1:: hygR***

W:GTTATTTGCTTTCTTAGTTT

X:GGGGATCCGTCGACCTGCAGCGTACGAGCACTGCTGAAGTTATCACC

Y:GTTTAAACGAGCTCGAATTCATCGATGGTGAAATTTATGGCGAACTGC

Z:TTATCAGGGTTCGTCAACTCC
